# Supplementary material
Source: PubMed Central journal article supplement (PMC8117773)
Supplement: AEM.02753-20-s0001.pdf [file AEM.02753-20-s0001.pdf]

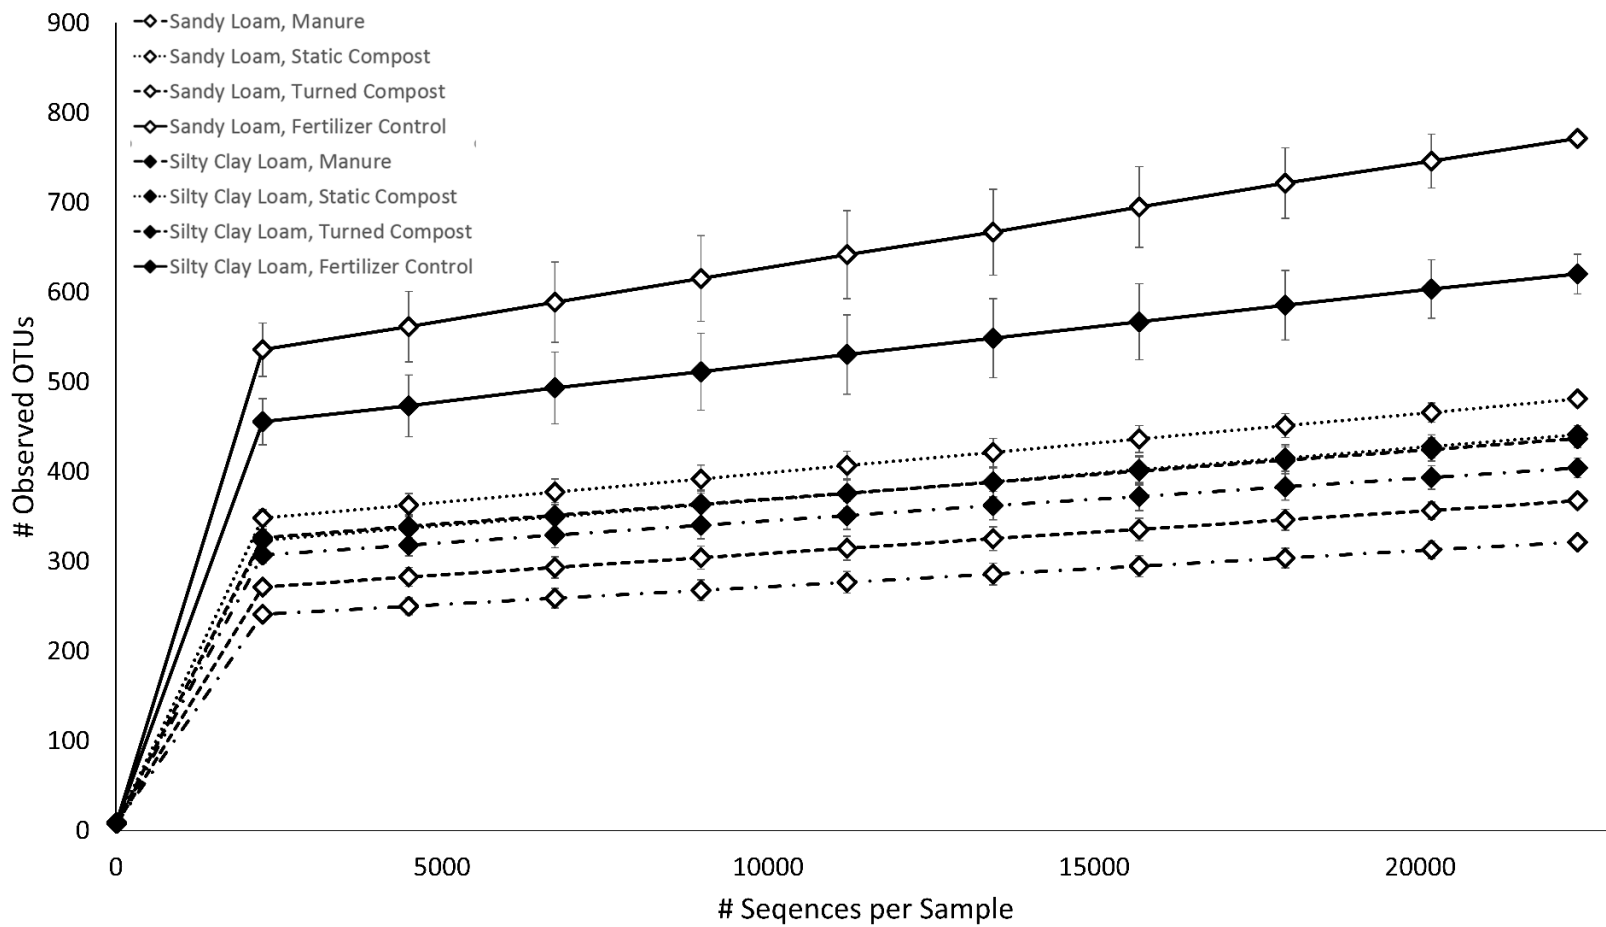

Figure S1. Rarefaction curve for the number of observed OTUs versus the number of sequences generated per sample. Radishes were grown in either Loamy Sand (open) or silty clay loam (closed) amended with manure (dashes and dots, n = 12), static compost (dots, n = 12), turned compost (dashes, n = 11, Loamy Sand; n = 12, silty clay loam), or fertilizer control (solid, n = 3). Error bars indicate standard error. Cattle types of all antibiotic treatments were combined within manure and compost.

**Table S1. Shannon and Chao1 values of radish taproot bacterial communities (n=3).**

| Soil Texture    | Amendment Type     | Cattle Type | Shannon Index<br>(H', Mean $\pm$ SE) | Lower<br>Chao1 | Chao<br>Mean | Upper<br>Chao1 | Evenness |
|-----------------|--------------------|-------------|--------------------------------------|----------------|--------------|----------------|----------|
| Loamy Sand      | Fertilizer Control | n/a         | 7.57 $\pm$ 0.13                      | 1621           | 1826         | 2189           | 0.98     |
| Loamy Sand      | Static Compost     | BC          | 6.41 $\pm$ 0.10                      | 943            | 1231         | 1375           | 0.89     |
| Loamy Sand      | Static Compost     | BA          | 6.63 $\pm$ 0.26                      | 872            | 1134         | 1437           | 0.91     |
| Loamy Sand      | Static Compost     | DC          | 6.54 $\pm$ 0.22                      | 872            | 1280         | 1896           | 0.87     |
| Loamy Sand      | Static Compost     | DA          | 5.88 $\pm$ 0.28                      | 542            | 948          | 1234           | 0.83     |
| Loamy Sand      | Turned Compost     | BC          | 6.10 $\pm$ 0.66                      | 603            | 1010         | 1537           | 0.83     |
| Loamy Sand      | Turned Compost     | BA          | 6.00 $\pm$ 0.32                      | 509            | 710          | 861            | 0.89     |
| Loamy Sand      | Turned Compost     | DC          | 5.95 $\pm$ 0.17                      | 685            | 855          | 1025           | 0.86     |
| Loamy Sand      | Turned Compost     | DA          | 5.17 $\pm$ 0.32                      | 596            | 807          | 966            | 0.75     |
| Loamy Sand      | Manure             | BC          | 6.12 $\pm$ 0.47                      | 334            | 808          | 1206           | 0.86     |
| Loamy Sand      | Manure             | BA          | 5.03 $\pm$ 0.31                      | 293            | 526          | 899            | 0.74     |
| Loamy Sand      | Manure             | DC          | 5.03 $\pm$ 0.66                      | 298            | 836          | 1674           | 0.68     |
| Loamy Sand      | Manure             | DA          | 6.32 $\pm$ 0.03                      | 600            | 866          | 1357           | 0.88     |
| Silty Clay Loam | Fertilizer Control | n/a         | 7.23 $\pm$ 0.45                      | 763            | 1247         | 1754           | 0.97     |
| Silty Clay Loam | Static Compost     | BC          | 5.70 $\pm$ 0.53                      | 696            | 938          | 1110           | 0.81     |
| Silty Clay Loam | Static Compost     | BA          | 5.64 $\pm$ 0.59                      | 626            | 666          | 736            | 0.85     |
| Silty Clay Loam | Static Compost     | DC          | 6.42 $\pm$ 0.88                      | 585            | 1120         | 1630           | 0.87     |
| Silty Clay Loam | Static Compost     | DA          | 6.14 $\pm$ 0.64                      | 625            | 1032         | 1438           | 0.84     |
| Silty Clay Loam | Turned Compost     | BC          | 7.06 $\pm$ 0.35                      | 450            | 1068         | 1554           | 0.96     |
| Silty Clay Loam | Turned Compost     | BA          | 6.33 $\pm$ 1.09                      | 395            | 796          | 1458           | 0.87     |
| Silty Clay Loam | Turned Compost     | DC          | 5.91 $\pm$ 0.57                      | 360            | 807          | 1412           | 0.81     |
| Silty Clay Loam | Turned Compost     | DA          | 6.40 $\pm$ 0.74                      | 465            | 1069         | 1501           | 0.87     |
| Silty Clay Loam | Manure             | BC          | 6.06 $\pm$ 0.95                      | 461            | 997          | 1976           | 0.80     |
| Silty Clay Loam | Manure             | BA          | 6.64 $\pm$ 0.21                      | 794            | 1099         | 1636           | 0.90     |
| Silty Clay Loam | Manure             | DC          | 5.83 $\pm$ 0.34                      | 473            | 594          | 794            | 0.87     |
| Silty Clay Loam | Manure             | DA          | 5.45 $\pm$ 0.19                      | 429            | 537          | 740            | 0.83     |

**Table S2. Soil properties of silty clay loam and Loamy Sand collected in Virginia prior to seeding and mixing with any soil amendments.**

| Soil<br>Texture       | Organic<br>Matter<br>(%<br>Rate) | Estimated<br>Nitrogen<br>Release | P (ppm,<br>Mehlich<br>3) | K<br>(ppm) | Mg<br>(ppm) | Ca<br>(ppm) | pH                              | Acidity<br>(mEq/100g) | Percent Base Saturation                      |          |           |       |          |                            |
|-----------------------|----------------------------------|----------------------------------|--------------------------|------------|-------------|-------------|---------------------------------|-----------------------|----------------------------------------------|----------|-----------|-------|----------|----------------------------|
|                       |                                  |                                  |                          |            |             |             |                                 |                       | Cation<br>Exchange<br>Capacity<br>(mEq/100g) | K<br>(%) | Mg<br>(%) | Ca(%) | H<br>(%) | NO <sub>3</sub> N<br>(ppm) |
| Silty<br>Clay<br>Loam | 8.6                              | 150                              | 75                       | 340        | 522         | 2074        | 6.8<br>5.3<br>(buffer<br>index) | 0.5                   | 16.1                                         | 5.4      | 27        | 64.4  | 2.9      | 37                         |
| Loamy<br>Sand         | 1.5                              | 75                               | 198                      | 165        | 47          | 305         | 6.82)                           | 1.1                   | 3.4                                          | 12.4     | 11.5      | 44.9  | 31       | 8                          |

Analyses performed by Waypoint Analytical Virginia, Inc. (Richmond, VA).

**Table S3. Geometric means of soil amendments mixed with soils prior to direct seeding.**

| Amendment | %Dry<br>Matter | Mass added to pots<br>(g) | Dry Matter<br>(g) | C (g,<br>Dry) | N (g,<br>Dry) | P (mg,<br>Dry) | K (mg,<br>Dry) |
|-----------|----------------|---------------------------|-------------------|---------------|---------------|----------------|----------------|
| Manure    | 44.08%         | 40.9                      | 18.03             | 10.07         | 0.21          | 0.38           | 2.09           |
| Compost   | 43.70%         | 26.7                      | 11.67             | 5.37          | 0.26          | 0.31           | 1.66           |

**Table S4. Geometric means of radish taproot masses (n = 3) at harvest.**

| <b>Soil Type</b> | <b>Amendment Type</b> | <b>Cattle Type</b> | <b>Average Mass (g) ± SE</b> |
|------------------|-----------------------|--------------------|------------------------------|
| Loamy Sand       | Fertilizer Control    | n/a                | 23.04 ± 1.29                 |
| Silty Clay Loam  | Fertilizer Control    | n/a                | 24.65 ± 1.55                 |
| Loamy Sand       | Static Compost        | DC                 | 32.64 ± 5.73                 |
| Loamy Sand       | Static Compost        | DA                 | 35.11 ± 1.33                 |
| Loamy Sand       | Turned Compost        | DC                 | 28.40 ± 4.13                 |
| Loamy Sand       | Turned Compost        | DA                 | 20.83 ± 9.25                 |
| Silty Clay Loam  | Static Compost        | DC                 | 24.18 ± 4.40                 |
| Silty Clay Loam  | Static Compost        | DA                 | 28.96 ± 2.38                 |
| Silty Clay Loam  | Turned Compost        | DC                 | 20.92 ± 4.55                 |
| Silty Clay Loam  | Turned Compost        | DA                 | 30.22 ± 2.04                 |
| Loamy Sand       | Static Compost        | BC                 | 27.54 ± 1.55                 |
| Loamy Sand       | Static Compost        | BA                 | 28.25 ± 1.27                 |
| Loamy Sand       | Turned Compost        | BC                 | 26.01 ± 4.12                 |
| Loamy Sand       | Turned Compost        | BA                 | 29.69 ± 2.90                 |
| Silty Clay Loam  | Static Compost        | BC                 | 23.79 ± 2.90                 |
| Silty Clay Loam  | Static Compost        | BA                 | 26.17 ± 3.12                 |
| Silty Clay Loam  | Turned Compost        | BC                 | 21.10 ± 1.66                 |
| Silty Clay Loam  | Turned Compost        | BA                 | 25.34 ± 3.93                 |
| Loamy Sand       | Manure                | DC                 | 14.11 ± 7.66                 |
| Loamy Sand       | Manure                | DA                 | 29.53 ± 4.43                 |
| Loamy Sand       | Manure                | BC                 | 26.96 ± 5.35                 |
| Loamy Sand       | Manure                | BA                 | 14.36 ± 7.57                 |
| Silty Clay Loam  | Manure                | DC                 | 28.45 ± 1.76                 |
| Silty Clay Loam  | Manure                | DA                 | 25.80 ± 3.17                 |
| Silty Clay Loam  | Manure                | BC                 | 26.52 ± 6.27                 |
| Silty Clay Loam  | Manure                | BA                 | 21.23 ± 3.10                 |
